# Supplementary material
Source: PubMed Central journal article supplement (PMC3719524)
Supplement: AEM.00737-13_zam999104562so1.pdf [file AEM.00737-13_zam999104562so1.pdf]

Table S1 Oligonucleotide primers used in this study

| Primer name               | Oligonucleotide sequence (5'→3') |
|---------------------------|----------------------------------|
| RT-qPCR of predicted ORFs |                                  |
| ORF1 FWD                  | CCGAGAAGACATCGTGTTCAAA           |
| ORF1 REV                  | ATCCACTACGGCAGCCTCAT             |
| ORF2 FWD                  | CGCCACATCGGTGAAACTCT             |
| ORF2 REV                  | CGCAGGTAGTAGGACTTGGATC           |
| ORF3 FWD                  | GGACGATCCCCACCAACG               |
| ORF3 REV                  | GCGTTCAGGTCGCAGATG               |
| ORF4 FWD                  | CCAACGGCTCCGACAGAT               |
| ORF4 REV                  | ATGGAGTCGAATGGGTCAAG             |
| ORF5 FWD                  | CAACCCCCCTCACACTCC               |
| ORF5 REV                  | ACGTCTCACAGAGCCTCTGGT            |
| ORF6 FWD                  | GCCACTTTCTCCACCATCCAG            |
| ORF6 REV                  | TCCAATCGGTGATAGAAGCA             |
| ORF7 FWD                  | CCCCCGTGAGGAATGGA                |
| ORF7 REV                  | CGAAGAGTGTCGGACGCAG              |
| ORF8 FWD                  | GCCTGTGGGGTTTCAGTGTC             |
| ORF8 REV                  | CATCAAACCGCATGAAATCAAC           |
| ORF9 FWD                  | CAAGTCAAACGGCTGCTCAC             |
| ORF9 REV                  | GTTGCCAATACCACCCTTCC             |
| ORF10 FWD                 | CTGGTCGCAATCAGCGTAAT             |
| ORF10 REV                 | GACCCTGACTTGGTGTCTCC             |
| ORF11 FWD                 | CCCTGGGGACACCCTCAT               |
| ORF11 REV                 | AGAACGGAACCCGACACCT              |
| 16S FWD                   | TAACACATGCAAGTCGAACG             |
| 16S REV                   | GGTTACCTTGTTACGACTTAGTCC         |
| gld FWD                   | TAATGAAATCAACCGCCTACG            |
| gld REV                   | ATTCCCCTTCGTGCGGTGTAT            |
| Cloning experiments       |                                  |
| CM-FWD                    | ACACCCGAACATGTCGCGTGG            |
| CM-REV                    | TCAATTGGCCTCCGCCGC               |
| GLD-FWD                   | CCATCGATATGGATCGCATTATTCAATCACC  |
| GLD-REV                   | CGGGGTACCTTATTCCCATTCTGCAGGAAG   |
| pZGX04-FWD                | CGGGGTACCTGGACGATTGAGTACACCGAC   |
| pZGX04-REV                | CCATCGATCATCACGCACCTCCTGACTAC    |
